# Supplementary material
Source: PubMed Central journal article supplement (PMC10530463)
Supplement: NIHMS1924183-supplement-8.pdf [file NIHMS1924183-supplement-8.pdf]

**SUPPLEMENTAL TABLE 1. *Drosophila* genotypes related to each figure.**

| Figure   | Genotype                                                                                                                                                                                                                                                                                                                                                        |
|----------|-----------------------------------------------------------------------------------------------------------------------------------------------------------------------------------------------------------------------------------------------------------------------------------------------------------------------------------------------------------------|
| Figure 1 |                                                                                                                                                                                                                                                                                                                                                                 |
| A        | <i>w*</i> , <i>Atg8<sup>A</sup>/w*</i> ;+;+;+                                                                                                                                                                                                                                                                                                                   |
| B        | <i>w*</i> , <i>Atg8<sup>A</sup>/w*</i> , <i>Atg8<sup>A</sup></i> ;+;+                                                                                                                                                                                                                                                                                           |
| D        | <i>y*</i> , <i>w*</i> , <i>hs::Flp/w*</i> (or <i>y</i> );FRT42D, <i>Ubi::RFP/FRT42D</i> , <i>Atg9<sup>D51</sup></i> ;Sec61α-GFP/+                                                                                                                                                                                                                               |
| F        | <i>y*</i> , <i>w*</i> , <i>hs::Flp/w*</i> (or <i>y</i> );+;FRT82B, <i>Ubi::RFP/Sec61α-GFP</i> , FRT82B, <i>Atg16<sup>A</sup></i>                                                                                                                                                                                                                                |
| H        | <i>w*/y</i> ;NP1::Gal4/+; <i>Luciferase</i> RNAi/+ (Ctrl),<br><i>w*/y</i> ;NP1::Gal4/UAS:: <i>Atg1</i> RNAi/+ ( <i>Atg1<sup>IR</sup></i> ),<br><i>w*/y</i> ;NP1::Gal4/+;UAS:: <i>Atg9</i> RNAi/+ ( <i>Atg9<sup>IR</sup></i> )                                                                                                                                   |
| J        | <i>w*/y</i> ;+; <i>Atg16<sup>A</sup></i> /+ (Ctrl),<br><i>w*/y</i> ;+; <i>Atg16<sup>A</sup>/Atg16<sup>A</sup></i> ( <i>Atg16<sup>A</sup></i> )                                                                                                                                                                                                                  |
| N        | <i>y*</i> , <i>w*</i> , <i>hs::Flp/w*</i> (or <i>y</i> );FRT42D, <i>Ubi::RFP/NP1::Gal4</i> , FRT42D,<br><i>Atg9<sup>D51</sup></i> ;UAS::ss-pHluorin-mKate2-KDEL-V5/+                                                                                                                                                                                            |
| Figure 2 |                                                                                                                                                                                                                                                                                                                                                                 |
| A        | <i>y*</i> , <i>w*</i> , <i>hs::Flp/w*</i> (or <i>y</i> );+;FRT82B, <i>Ubi::RFP/Sec61α-GFP</i> , FRT82B, <i>Atf<sup>P</sup></i>                                                                                                                                                                                                                                  |
| C        | <i>y*</i> , <i>w*</i> , <i>hs::Flp/w*</i> (or <i>y</i> ); <i>Ubi::RFP</i> , FRT40A/ <i>Rtn1<sup>1w</sup></i> , FRT40A;Sec61α-GFP/+                                                                                                                                                                                                                              |
| E        | <i>y*</i> , <i>w*</i> , <i>hs::Flp/w*</i> (or <i>y</i> ); <i>Ubi::RFP</i> , FRT40A/ <i>Trp1<sup>KG</sup></i> , FRT40A;Sec61α-GFP/+                                                                                                                                                                                                                              |
| H        | <i>w*</i> , FRT19A/ <i>Atg8<sup>A</sup></i> , FRT19A; <i>hs::Flp/Rtn1-3xFlag-V5</i> ;+                                                                                                                                                                                                                                                                          |
| J        | <i>y*</i> , <i>w*</i> , <i>hs::Flp/w*</i> (or <i>y</i> ); <i>Rtn1-3xFlag-V5</i> ;+;FRT82B/FRT82B, <i>Atg16<sup>A</sup></i>                                                                                                                                                                                                                                      |
| L        | <i>y*</i> , <i>w*</i> , <i>hs::Flp/w*</i> (or <i>y</i> );FRT42D/FRT42D, <i>Atg9<sup>D51</sup></i> ;AtI-3xFlag-V5/+                                                                                                                                                                                                                                              |
| N        | <i>w*</i> , FRT19A/ <i>Atg8<sup>A</sup></i> , FRT19A; <i>hs::Flp</i> ;+;AtI-3xFlag-V5/+                                                                                                                                                                                                                                                                         |
| P        | <i>w*/y</i> ;+;+                                                                                                                                                                                                                                                                                                                                                |
| Q        | <i>w*/y</i> ;+; <i>Atf<sup>P</sup>/Atf<sup>P</sup></i>                                                                                                                                                                                                                                                                                                          |
| R        | <i>w*/y</i> ;Rtn1 <sup>1w</sup> /Rtn1 <sup>1w</sup> ;+                                                                                                                                                                                                                                                                                                          |
| Figure 3 |                                                                                                                                                                                                                                                                                                                                                                 |
| A        | <i>y*</i> , <i>w*</i> , <i>hs::Flp/w*</i> (or <i>y</i> );NP1::Gal4, UAS::Mito-GFP/+;FRT2A/ <i>Vps13D<sup>M</sup></i> , FRT2A                                                                                                                                                                                                                                    |
| D        | <i>y*</i> , <i>w*</i> , <i>hs::Flp/w*</i> (or <i>y</i> );NP1::Gal4, UAS::Mito-GFP/+;FRT82B,<br><i>Ubi::RFP/FRT82B</i> , <i>Atg16<sup>A</sup></i>                                                                                                                                                                                                                |
| E        | <i>y*</i> , <i>w*</i> , <i>hs::Flp/w*</i> (or <i>y</i> ); <i>Ubi::RFP</i> , FRT40A/ <i>Rtn1<sup>1w</sup></i> , FRT40A;Tub::Gal4,<br>UAS::Mito-GFP/+                                                                                                                                                                                                             |
| F        | <i>y*</i> , <i>w*</i> , <i>hs::Flp/w*</i> (or <i>y</i> ); <i>Ubi::RFP</i> , FRT40A/ <i>Trp1<sup>KG</sup></i> , FRT40A;Tub::Gal4,<br>UAS::Mito-GFP/+                                                                                                                                                                                                             |
| G        | <i>y*</i> , <i>w*</i> , <i>hs::Flp/w*</i> (or <i>y</i> );NP1::Gal4, UAS::Mito-GFP/+;FRT82B,<br><i>Ubi::RFP/FRT82B</i> , <i>Atf<sup>P</sup></i>                                                                                                                                                                                                                  |
| I        | <i>y*</i> , <i>w*</i> , <i>hs::Flp/w*</i> (or <i>y</i> );UAS::Cas9/ <i>BNIP3<sup>WKO</sup></i> ;Sec61α-GFP, Act<CD2>Gal4,<br>UAS::dsRed/+                                                                                                                                                                                                                       |
| Figure 4 |                                                                                                                                                                                                                                                                                                                                                                 |
| A        | <i>y*</i> , <i>w*</i> , <i>hs::Flp</i> , <i>Ubi::RFP</i> , FRT19A/ <i>PINK1<sup>B9</sup></i> , FRT19A;+;Sec61α-GFP/+                                                                                                                                                                                                                                            |
| B        | <i>y*</i> , <i>w*</i> , <i>hs::Flp</i> , <i>Ubi::RFP</i> , FRT19A/ <i>Atg8<sup>A</sup></i> , FRT19A;+;Sec61α-GFP/+                                                                                                                                                                                                                                              |
| C        | <i>y*</i> , <i>w*</i> , <i>hs::Flp</i> , <i>Ubi::RFP</i> , FRT19A/ <i>PINK1<sup>B9</sup></i> , <i>Atg8<sup>A</sup></i> , FRT19A;+;Sec61α-GFP/+                                                                                                                                                                                                                  |
| E        | <i>w*/y</i> ;+;+ (Larva),<br><i>w*/y</i> ;+;+ (APF),<br><i>w*</i> , <i>Atg8<sup>A</sup>/y</i> ;+;+ ( <i>Atg8<sup>A</sup></i> , APF),<br><i>w*</i> , <i>PINK1<sup>B9</sup>/y</i> ;+;+ ( <i>PINK1<sup>B9</sup></i> , APF),<br><i>w*</i> , <i>Atg8<sup>A</sup></i> , <i>PINK1<sup>B9</sup>/y</i> ;+;+ ( <i>Atg8<sup>A</sup></i> , <i>PINK1<sup>B9</sup></i> , APF) |
| H        | <i>y*</i> , <i>w*</i> , <i>hs::Flp</i> , His2Av::GFP, FRT19A/ <i>PINK1<sup>B9</sup></i> , FRT19A;Rtn1-3xFlag-V5/+;+                                                                                                                                                                                                                                             |
| J        | <i>y*</i> , <i>w*</i> , <i>hs::Flp</i> , His2Av::GFP, FRT19A/ <i>PINK1<sup>B9</sup></i> , FRT19A;+;AtI-3xFlag-V5/+                                                                                                                                                                                                                                              |
| L        | <i>w*/y</i> ;Rtn1-3xFlag-V5/+;+ (Ctrl,Rtn1V5),                                                                                                                                                                                                                                                                                                                  |

|           |                                                                                                                                                                                                                                                                                                                                                                                     |
|-----------|-------------------------------------------------------------------------------------------------------------------------------------------------------------------------------------------------------------------------------------------------------------------------------------------------------------------------------------------------------------------------------------|
|           | <i>w*</i> , <i>PINK1<sup>B9</sup>/y</i> ;Rtnl1-3xFlag-V5/+;+ ( <i>PINK1<sup>B9</sup></i> , Rtnl1V5),<br><i>w*/y</i> ;+;Atl-3xFlag-V5/+ (Ctrl,AtlV5),<br><i>w*</i> , <i>PINK1<sup>B9</sup>/y</i> ;+;Atl-3xFlag-V5/+ ( <i>PINK1<sup>B9</sup></i> , AtlV5),                                                                                                                            |
| Figure 5  |                                                                                                                                                                                                                                                                                                                                                                                     |
| A         | <i>y*</i> , <i>w*</i> , <i>hs::Flp/w*</i> (or <i>y</i> );NP1::Gal4, UAS::Mito-GFP/+;FRT2A/ <i>Park<sup>Δ</sup></i> , FRT2A                                                                                                                                                                                                                                                          |
| C         | <i>y*</i> , <i>w*</i> , <i>hs::Flp/w*</i> (or <i>y</i> );Rtnl1-3xFlag-V5/+;His2Av-RFP, FRT2A/ <i>Park<sup>Δ</sup></i> , FRT2A                                                                                                                                                                                                                                                       |
| E         | <i>w*/y</i> ;+;+ (Ctrl),                                                                                                                                                                                                                                                                                                                                                            |
| F         | <i>w*/y</i> ;+; <i>Park<sup>25</sup>/Park<sup>25</sup></i> ( <i>Park<sup>25</sup></i> )                                                                                                                                                                                                                                                                                             |
| H         | <i>w*/y</i> ;+;+ (Ctrl),<br><i>w*/y</i> ;+; <i>Park<sup>25</sup>/Park<sup>25</sup></i> ( <i>Park<sup>25</sup></i> )                                                                                                                                                                                                                                                                 |
| K         | <i>w*/y</i> ;Rtnl1-3xFlag-V5/+;+ (Ctrl, Rtnl1V5),<br><i>w*/y</i> ;Rtnl1-3xFlag-V5/+; <i>Park<sup>25</sup>/Park<sup>25</sup></i> ( <i>Park<sup>25</sup></i> , Rtnl1V5),<br><i>w*/y</i> ;+;Atl-3xFlag-V5/+ (Ctrl, AtlV5),<br><i>w*/y</i> ;+;Atl-3xFlag-V5, <i>Park<sup>25</sup>/Park<sup>25</sup></i> ( <i>Park<sup>25</sup></i> , AtlV5)                                             |
| P         | <i>w*/y</i> ;+;+                                                                                                                                                                                                                                                                                                                                                                    |
| Q         | <i>w*</i> , <i>PINK1<sup>B9</sup>/y</i> ;+;+                                                                                                                                                                                                                                                                                                                                        |
| R         | <i>w*/y</i> ;+; <i>Park<sup>25</sup>/Park<sup>25</sup></i>                                                                                                                                                                                                                                                                                                                          |
| Figure 6  |                                                                                                                                                                                                                                                                                                                                                                                     |
| A         | <i>y*</i> , <i>w*</i> , <i>hs::Flp/w*</i> (or <i>y</i> );+;FRT82B, Ubi::RFP/Sec61α-GFP, FRT82B, <i>Keap1<sup>036</sup></i>                                                                                                                                                                                                                                                          |
| C         | <i>y*</i> , <i>w*</i> , <i>hs::Flp/w*</i> (or <i>y</i> ); Ubi::RFP, FRT40A/ <i>Cul3<sup>Δ</sup></i> , FRT40A;Sec61α-GFP/+                                                                                                                                                                                                                                                           |
| E         | <i>y*</i> , <i>w*</i> , <i>hs::Flp/w*</i> (or <i>y</i> );NP1::Gal4, UAS::Mito-GFP/+;FRT82B/FRT82B,<br><i>Keap1<sup>036</sup></i>                                                                                                                                                                                                                                                    |
| H         | <i>y*</i> , <i>w*</i> , <i>hs::Flp/w*</i> (or <i>y</i> );NP1::Gal4, UAS::Mito-GFP/+;FRT82B/FRT82B,<br><i>Keap1<sup>036</sup></i>                                                                                                                                                                                                                                                    |
| K         | <i>y*</i> , <i>w*</i> , <i>hs::Flp/w*</i> (or <i>y</i> );Rtnl1-3xFlag-V5/+;FRT82B/FRT82B, <i>Keap1<sup>036</sup></i>                                                                                                                                                                                                                                                                |
| M         | <i>y*</i> , <i>w*</i> , <i>hs::Flp/w*</i> (or <i>y</i> ); <i>Keap1</i> RNAi/+;Atl-3xFlag-V5, Act<CD2>Gal4,<br>UAS::dsRed/+                                                                                                                                                                                                                                                          |
| O         | <i>w*/y</i> ;NP1::Gal4, Rtnl1-3xFlag-V5/+; <i>Luciferase</i> RNAi/+ (Ctrl, Rtnl1V5),<br><i>w*/y</i> ;NP1::Gal4, Rtnl1-3xFlag-V5/ <i>Keap1</i> RNAi/+ ( <i>Keap1<sup>IR</sup></i> , Rtnl1V5),<br><i>w*/y</i> ;NP1::Gal4/+;Atl-3xFlag-V5/+; <i>Luciferase</i> RNAi/+ (Ctrl, AtlV5),<br><i>w*/y</i> ;NP1::Gal4/ <i>Keap1</i> RNAi;Atl-3xFlag-V5/+ ( <i>Keap1<sup>IR</sup></i> , AtlV5) |
| Figure 7  |                                                                                                                                                                                                                                                                                                                                                                                     |
| A         | <i>y*</i> , <i>w*</i> , <i>hs::Flp</i> , His2Av::GFP, FRT19A/ <i>PINK1<sup>B9</sup></i> , FRT19A;+;Keap1-3xFlag-V5/+                                                                                                                                                                                                                                                                |
| C         | <i>y*</i> , <i>w*</i> , <i>hs::Flp/w*</i> (or <i>y</i> );+;His2Av-RFP, FRT2A/ <i>Park<sup>Δ</sup></i> , FRT2A, Keap1-3xFlag-V5                                                                                                                                                                                                                                                      |
| E         | <i>w*/y</i> ;+;Keap1-3xFlag-V5/+ (Ctrl, Keap1V5),<br><i>w*</i> , <i>PINK1<sup>B9</sup>/y</i> ;+;Keap1-3xFlag-V5/+ ( <i>PINK1<sup>B9</sup></i> , Keap1V5)<br><i>w*/y</i> ;+; <i>Park<sup>25</sup></i> , Keap1-3xFlag-V5/ <i>Park<sup>25</sup></i> ( <i>Park<sup>25</sup></i> , Keap1V5)                                                                                              |
| G         | <i>w*/y</i> ;Rtnl1-3xFlag-V5/+;+ (Ctrl,Rtnl1V5),<br><i>w*</i> , <i>PINK1<sup>B9</sup>/y</i> ;Rtnl1-3xFlag-V5/+;+ ( <i>PINK1<sup>B9</sup></i> , Rtnl1V5)                                                                                                                                                                                                                             |
| I         | <i>w*/y</i> ;Rtnl1-3xFlag-V5/+;+ (Ctrl, Rtnl1V5),<br><i>w*/y</i> ;Rtnl1-3xFlag-V5/+; <i>Park<sup>25</sup>/Park<sup>25</sup></i> ( <i>Park<sup>25</sup></i> , Rtnl1V5),                                                                                                                                                                                                              |
| K         | <i>w*/y</i> ;NP1::Gal4, Rtnl1-3xFlag-V5/+; <i>Luciferase</i> RNAi/+ (Ctrl, Rtnl1V5),<br><i>w*/y</i> ;NP1::Gal4, Rtnl1-3xFlag-V5/ <i>Keap1</i> RNAi/+ ( <i>Keap1<sup>IR</sup></i> , Rtnl1V5),                                                                                                                                                                                        |
| M         | <i>w*/y</i> ;NP1::Gal4, UAS::ss-pHluorin-mKate2-KDEL-V5/+; <i>Luciferase</i> RNAi/+                                                                                                                                                                                                                                                                                                 |
| N         | <i>w*/y</i> ;NP1::Gal4, UAS::ss-pHluorin-mKate2-KDEL-V5/ <i>Keap1</i> RNAi/+                                                                                                                                                                                                                                                                                                        |
| O         | <i>w*</i> , <i>PINK1<sup>B9</sup>/y</i> ; NP1::Gal4, UAS::ss-pHluorin-mKate2-KDEL-V5/+;+                                                                                                                                                                                                                                                                                            |
| P         | <i>w*</i> , <i>PINK1<sup>B9</sup>/y</i> ; NP1::Gal4, UAS::ss-pHluorin-mKate2-KDEL-V5/ <i>Keap1</i> RNAi/+                                                                                                                                                                                                                                                                           |
| Figure S1 |                                                                                                                                                                                                                                                                                                                                                                                     |
| C         | <i>y*</i> , <i>w*</i> , <i>hs::Flp/w*</i> (or <i>y</i> );FRT42D, Ubi::RFP/FRT42D, <i>Vps34<sup>M22</sup></i> ;Sec61α-GFP/+                                                                                                                                                                                                                                                          |

|           |                                                                                                                                                                                                                                                                                                                                                                                                          |
|-----------|----------------------------------------------------------------------------------------------------------------------------------------------------------------------------------------------------------------------------------------------------------------------------------------------------------------------------------------------------------------------------------------------------------|
| E         | <i>y*</i> , <i>w*</i> , <i>hs::Flp/w*</i> (or <i>y</i> ); <i>FRT42D/FRT42D</i> , <i>Atg9<sup>D51</sup></i> ;+                                                                                                                                                                                                                                                                                            |
| G         | <i>y*</i> , <i>w*</i> , <i>hs::Flp/w*</i> (or <i>y</i> );+; <i>FRT82B/FRT82B</i> , <i>Atg16<sup>A</sup></i>                                                                                                                                                                                                                                                                                              |
| I         | <i>y*</i> , <i>w*</i> , <i>hs::Flp/w*</i> (or <i>y</i> ); <i>FRT42D/FRT42D</i> , <i>Vps34<sup>M22</sup></i> ;+                                                                                                                                                                                                                                                                                           |
| K         | <i>w*/y</i> ;NP1::Gal4, UAS::ss-pHluorin-mKate2-KDEL-V5/+;+                                                                                                                                                                                                                                                                                                                                              |
| L         | <i>w*/y</i> ;+;+ (larva),<br><i>w*/y</i> ;NP1::Gal4, UAS::ss-pHluorin-mKate2-KDEL-V5/+;+ (Larva),<br><i>w*/y</i> ;NP1::Gal4, UAS::ss-pHluorin-mKate2-KDEL-V5/+; <i>Atg16<sup>A</sup>/Atg16<sup>A</sup></i> (Larva),<br><i>w*/y</i> ;NP1::Gal4, UAS::ss-pHluorin-mKate2-KDEL-V5/+;+ (APF),<br><i>w*/y</i> ;NP1::Gal4, UAS::ss-pHluorin-mKate2-KDEL-V5/+; <i>Atg16<sup>A</sup>/Atg16<sup>A</sup></i> (APF) |
| N         | <i>y*</i> , <i>w*</i> , <i>hs::Flp/w*</i> (or <i>y</i> );NP1::Gal4, UAS::ss-pHluorin-mKate2-KDEL-V5/+; <i>FRT82B/FRT82B</i> , <i>Atg16<sup>A</sup></i>                                                                                                                                                                                                                                                   |
| Figure S2 |                                                                                                                                                                                                                                                                                                                                                                                                          |
| J         | <i>y*</i> , <i>w*</i> , <i>hs::Flp/w*</i> (or <i>y</i> ); <i>Rtnl1-3xFlag-V5/+</i> ; <i>FRT82B</i> , <i>Atf<sup>2</sup>/FRT82B</i>                                                                                                                                                                                                                                                                       |
| Figure S3 |                                                                                                                                                                                                                                                                                                                                                                                                          |
| A         | <i>y*</i> , <i>w*</i> , <i>hs::Flp/w*</i> (or <i>y</i> ); <i>Vps13D RNAi/+</i> ;Sec61α-GFP, Act<CD2>Gal4, UAS::dsRed/+                                                                                                                                                                                                                                                                                   |
| C         | <i>w*/y</i> ;+;+                                                                                                                                                                                                                                                                                                                                                                                         |
| D         | <i>w*/y</i> ;+; <i>Vps13D<sup>AUBA</sup>/Df(3L)BSC631</i>                                                                                                                                                                                                                                                                                                                                                |
| G         | <i>y*</i> , <i>w*</i> , <i>hs::Flp/w*</i> (or <i>y</i> );+;Sec61α-GFP, Act<CD2>Gal4, UAS::dsRed/ <i>BNIP3 RNAi</i>                                                                                                                                                                                                                                                                                       |
| K         | <i>w*/y</i> ;NP1::Gal4, UAS::ss-pHluorin-mKate2-KDEL-V5/+;+                                                                                                                                                                                                                                                                                                                                              |
| L         | <i>w*/y</i> ;NP1::Gal4, UAS::ss-pHluorin-mKate2-KDEL-V5/+; <i>BNIP3<sup>A</sup>/BNIP3<sup>A</sup></i>                                                                                                                                                                                                                                                                                                    |
| Figure S4 |                                                                                                                                                                                                                                                                                                                                                                                                          |
| A         | <i>w*</i> , <i>FRT19A/PINK1<sup>B9</sup></i> , <i>FRT19A</i> ;hs::Flp/NP1::Gal4, UAS::Mito-GFP;+                                                                                                                                                                                                                                                                                                         |
| C         | <i>w*</i> , <i>hs::Flp/w*</i> (or <i>y</i> );+;Sec61α-GFP, Act<CD2>Gal4, UAS::dsRed/ <i>PINK1 RNAi(HMC04160)</i>                                                                                                                                                                                                                                                                                         |
| E         | <i>y*</i> , <i>w*</i> , <i>hs::Flp/w*</i> (or <i>y</i> ); <i>PINK1 RNAi (HMS01707)/+</i> ;Sec61α-GFP, Act<CD2>Gal4, UAS::dsRed/+                                                                                                                                                                                                                                                                         |
| G         | <i>w*/y</i> ;NP1::Gal4, UAS::ss-pHluorin-mKate2-KDEL-V5/+;+                                                                                                                                                                                                                                                                                                                                              |
| H         | <i>w*</i> , <i>PINK1<sup>B9</sup>/y</i> ; NP1::Gal4, UAS::ss-pHluorin-mKate2-KDEL-V5/+;+                                                                                                                                                                                                                                                                                                                 |
| I         | <i>w*</i> , <i>PINK1<sup>15</sup>/y</i> ; NP1::Gal4, UAS::ss-pHluorin-mKate2-KDEL-V5/+;+                                                                                                                                                                                                                                                                                                                 |
| K         | <i>w*/y</i> ;+;+<br><i>w*</i> , <i>PINK1-GFP/w*</i> , <i>PINK1-GFP</i> ;+;+ (Larva, Female)<br><i>w*</i> , <i>PINK1-GFP/w*</i> , <i>PINK1-GFP</i> ;+;+ (APF, Female)<br><i>w*</i> , <i>PINK1-GFP/y</i> ;+;+ (Larva, Male)<br><i>w*</i> , <i>PINK1-GFP/y</i> ;+;+ (APF, Male)                                                                                                                             |
| M         | <i>w*</i> , <i>PINK1-GFP/y</i> ;+;+                                                                                                                                                                                                                                                                                                                                                                      |
| N         | <i>w*</i> , <i>PINK1-GFP/y</i> ;Rtnl1-3xFlag-V5/+;+                                                                                                                                                                                                                                                                                                                                                      |
| Figure S5 |                                                                                                                                                                                                                                                                                                                                                                                                          |
| B         | <i>y*</i> , <i>w*</i> , <i>hs::Flp/w*</i> (or <i>y</i> );NP1::Gal4, UAS::Mito-GFP/+;His2AvRFP, <i>FRT2A/Park<sup>A</sup></i> , <i>FRT2A</i>                                                                                                                                                                                                                                                              |
| D         | <i>y*</i> , <i>w*</i> , <i>hs::Flp/w*</i> (or <i>y</i> );NP1::Gal4, UAS::Mito-GFP/+; <i>FRT2A/Park<sup>A</sup></i> , <i>FRT2A</i>                                                                                                                                                                                                                                                                        |
| F         | <i>y*</i> , <i>w*</i> , <i>hs::Flp/w*</i> (or <i>y</i> );NP1::Gal4, UAS::Mito-GFP/+; <i>FRT2A/Park<sup>A</sup></i> , <i>FRT2A</i>                                                                                                                                                                                                                                                                        |
| H         | <i>y*</i> , <i>w*</i> , <i>hs::Flp</i> , <i>PINK1-GFP/y</i> ;+;+; <i>FRT2A/Park<sup>A</sup></i> , <i>FRT2A</i>                                                                                                                                                                                                                                                                                           |
| J         | <i>y*</i> , <i>w*</i> , <i>hs::Flp/w*</i> (or <i>y</i> );NP1::Gal4, UAS::Mito-GFP/+; <i>FRT2A/Park<sup>A</sup></i> , <i>FRT2A</i>                                                                                                                                                                                                                                                                        |
| L         | <i>y*</i> , <i>w*</i> , <i>hs::Flp/w*</i> (or <i>y</i> );+;His2Av-RFP, <i>FRT2A/Park<sup>A</sup></i> , <i>FRT2A</i> , <i>Atl-3xFlag-V5</i>                                                                                                                                                                                                                                                               |
| Figure S6 |                                                                                                                                                                                                                                                                                                                                                                                                          |
| A         | <i>y*</i> , <i>w*</i> , <i>hs::Flp/w*</i> (or <i>y</i> );ARE-GFP/+; <i>FRT82B</i> , <i>Ubi::RFP/FRT82B</i> , <i>Keap1<sup>036</sup></i>                                                                                                                                                                                                                                                                  |
| C         | <i>y*</i> , <i>w*</i> , <i>hs::Flp/w*</i> (or <i>y</i> );+; <i>FRT82B</i> , <i>Ubi::RFP/FRT82B</i> , <i>CNC<sup>A</sup></i>                                                                                                                                                                                                                                                                              |

|           |                                                                                                                                                          |
|-----------|----------------------------------------------------------------------------------------------------------------------------------------------------------|
| D         | <i>y*</i> , <i>w*</i> , <i>hs::Flp/w*</i> (or <i>y</i> );+;FRT82B, Ubi::RFP/FRT82B, <i>Keap1</i> <sup>036</sup>                                          |
| F         | <i>y*</i> , <i>w*</i> , <i>hs::Flp/w*</i> (or <i>y</i> );+;FRT82B/FRT82B, <i>Keap1</i> <sup>036</sup>                                                    |
| G         | <i>y*</i> , <i>w*</i> , <i>hs::Flp/w*</i> (or <i>y</i> );+;FRT82B/FRT82B, <i>CNC</i> <sup>Δ</sup> , <i>Keap1</i> <sup>036</sup>                          |
| I         | <i>y*</i> , <i>w*</i> , <i>hs::Flp/w*</i> (or <i>y</i> );NP1::Gal4, UAS::ss-pHluorin-mKate2-KDEL-V5;FRT82B/FRT82B, <i>Keap1</i> <sup>036</sup>           |
| K         | <i>y*</i> , <i>w*</i> , <i>hs::Flp/w*</i> (or <i>y</i> );NP1::Gal4, UAS::Mito-GFP;FRT82B/FRT82B, <i>Keap1</i> <sup>036</sup>                             |
| M         | <i>y*</i> , <i>w*</i> , <i>hs::Flp/w*</i> (or <i>y</i> );NP1::Gal4, UAS::Mito-GFP;FRT82B/FRT82B, <i>Keap1</i> <sup>036</sup> , <i>Atg16</i> <sup>Δ</sup> |
| Figure S7 |                                                                                                                                                          |
| B         | <i>y*</i> , <i>w*</i> , <i>hs::Flp/w*</i> (or <i>y</i> );FRT42D/FRT42D, <i>Atg9</i> <sup>D51</sup> ;Keap1-3xFlag-V5/+                                    |
| D         | <i>y*</i> , <i>w*</i> , <i>hs::Flp/w*</i> (or <i>y</i> );+;His2Av-RFP, FRT2A/ <i>Park</i> <sup>Δ</sup> , FRT2A, Keap1-3xFlag-V5                          |
